# Supplementary material for: Associations between Maternal Cadmium Exposure with Risk of Preterm Birth and Low after Birth Weight Effect of Mediterranean Diet Adherence on Affected Prenatal Outcomes
Source: PubMed Central journal article supplement (PMC7712046; doi:10.3390/toxics8040090), 2020-10-20
Supplement: toxics-08-00090-s001.pdf [file toxics-08-00090-s001.pdf]

## Supplementary Materials: Associations between Maternal Cadmium Exposure with Risk of Preterm Birth and Low Birth Weight Effect of Mediterranean Diet Adherence on Affected Prenatal Outcomes

Sarah Gonzalez-Nahm, Kiran Nihlani, John S. House, Rachel L. Maguire, Harlyn G. Skinner and Cathrine Hoyo

**Table S1.** Regression coefficients and 95% confidence Intervals for the association/relationship between, cadmium exposure (log cd) and birth weight.

| Factor                                        | $\beta$ | 95% CI             | <i>p</i> |
|-----------------------------------------------|---------|--------------------|----------|
| Birth weight <sup>a</sup>                     | 77.31   | (-688.28, 242.90)  | 0.8426   |
| Birth weight, no gestational age <sup>d</sup> | -234.11 | (-1176.47, 708.24) | 0.625    |
| Birth weight, low Med adherence <sup>b</sup>  | -126.74 | (-907.64, 654.16)  | 0.7477   |
| Birth weight, high Med adherence <sup>c</sup> | -216.48 | (-1257.77, 824.81) | 0.6804   |

<sup>a</sup> Adjusted for smoking during pregnancy, pre-pregnancy BMI, gestational age and sex of the infant. <sup>b</sup> Adjusted for smoking during pregnancy, pre-pregnancy BMI, and sex of the infant. <sup>c</sup> Adjusted for smoking during pregnancy, pre-pregnancy BMI, gestational age and sex of the infant, among mothers with a Mediterranean diet score at or below 4. <sup>d</sup> Adjusted for smoking during pregnancy, pre-pregnancy BMI, gestational age and sex of the infant, among mothers with a Mediterranean diet score above 4.

**Table S2.** Odds ratio and 95% confidence Intervals for the association/relationship between, cadmium exposure (log cd) and preterm birth.

| Factor                                         | OR     | 95% CI        | <i>p</i> |
|------------------------------------------------|--------|---------------|----------|
| Preterm birth <sup>a</sup>                     | 0.0093 | (0, 1.75)     | 0.1244   |
| Preterm birth, no birth weight <sup>d</sup>    | 2.76   | (0.09, 48.63) | 0.5172   |
| Preterm birth, low Med adherence <sup>b</sup>  | 0      | (0, 0.8181)   | 0.1902   |
| Preterm birth, high Med adherence <sup>c</sup> | 0.0001 | (0, 50.82)    | 0.2008   |

<sup>a</sup> Adjusted for smoking during pregnancy, pre-pregnancy BMI, gestational age and sex of the infant. <sup>b</sup> Adjusted for smoking during pregnancy, pre-pregnancy BMI, and sex of the infant. <sup>c</sup> Adjusted for smoking during pregnancy, pre-pregnancy BMI, gestational age and sex of the infant, among mothers with a Mediterranean diet score at or below 4. <sup>d</sup> Adjusted for smoking during pregnancy, pre-pregnancy BMI, gestational age and sex of the infant, among mothers with a Mediterranean diet score above 4.

**Table S3.** Regression coefficients and 95% confidence Intervals for the association/relationship between, cadmium exposure (high/low) and 1) Apgar score, 2) Ponderal index.

| Factor                      | $\beta$ | 95% CI         | <i>p</i> |
|-----------------------------|---------|----------------|----------|
| Apgar score <sup>a</sup>    | -0.01   | (-0.134, 0.12) | 0.89     |
| Ponderal index <sup>a</sup> | -0.03   | (-0.11, 0.06)  | 0.51     |

<sup>a</sup> Adjusted for smoking during pregnancy, pre-pregnancy BMI, gestational age and sex of the infant.
